# Supplementary material for: Ordered mesoporous crystalline aluminas from self-assembly of ABC triblock terpolymer–butanol–alumina sols
Source: Royal Society of Chemistry journal article supplement (doi:10.1039/c5ra07421e), 2015-01-01
Supplement: c5ra07421e1.pdf [file c5ra07421e1.pdf]

†Electronic Supplementary Information for

## Ordered Mesoporous Crystalline Aluminas from Self-Assembly of ABC Triblock Terpolymer–Butanol–Alumina Sols

Kwan Wee Tan,<sup>a</sup> Hiroaki Sai,<sup>a</sup> Spencer W. Robbins,<sup>ab</sup> Jörg G. Werner,<sup>ab</sup> Tobias N. Hoheisel,<sup>a</sup>  
Sarah A. Hesse,<sup>ab</sup> Peter A. Beaucage,<sup>a</sup> Francis J. DiSalvo,<sup>b</sup> Sol M. Gruner,<sup>cd</sup> Martin Murtagh,<sup>a</sup>  
and Ulrich Wiesner<sup>\*a</sup>

<sup>a</sup>*Department of Materials Science and Engineering, Cornell University, Ithaca, New York 14853, USA.*

*E-mail: ubw1@cornell.edu*

<sup>b</sup>*Department of Chemistry and Chemical Biology, Cornell University, Ithaca, New York 14853, USA.*

<sup>c</sup>*Department of Physics, Cornell University, Ithaca, New York 14853, USA.*

<sup>d</sup>*Cornell High Energy Synchrotron Source, Cornell University, Ithaca, New York 14853, USA.*

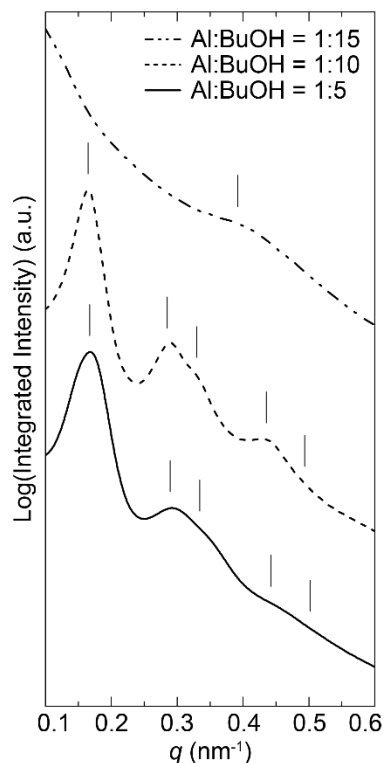

Fig. S1. Azimuthally integrated SAXS patterns of ISO- $\text{Al}_2\text{O}_3$  hybrids derived from different molar ratios of  $\text{Al}:n\text{-BuOH}$  as indicated. The molar ratio of  $\text{Al}(\text{O}^i\text{Bu})_3$  to  $\text{HNO}_3$  was maintained at 1:2 for all of these samples. The data sets are offset vertically for clarity. Tick marks on the lowest (solid) and middle (dashed) curves correspond to the hexagonal ( $p6mm$ ) lattice with  $q^* = 0.167 \text{ nm}^{-1}$  and  $q^* = 0.164 \text{ nm}^{-1}$ , respectively. The top (dash-dotted) curve suggests micellar aggregate formation with  $q^* = 0.392 \text{ nm}^{-1}$ .

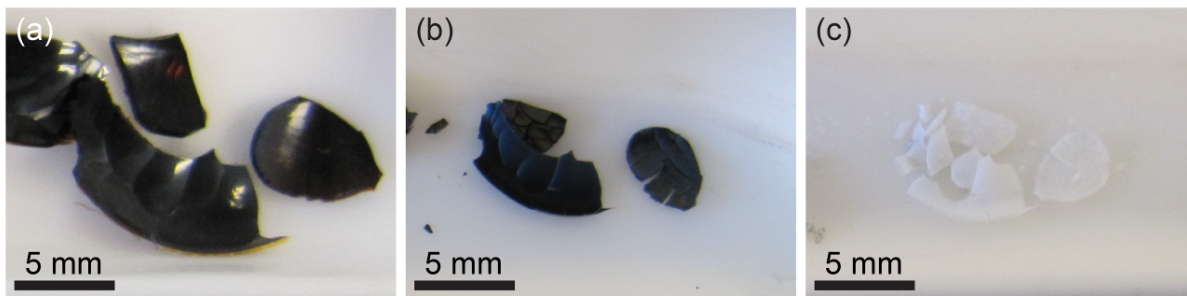

Fig. S2. Optical images of (a) ISO- $\text{Al}_2\text{O}_3$  hybrid, (b) MCA-C-1200 composite, and (c) all- $\text{Al}_2\text{O}_3$  MCA-CASH-1200 monolithic samples after carbon removal.

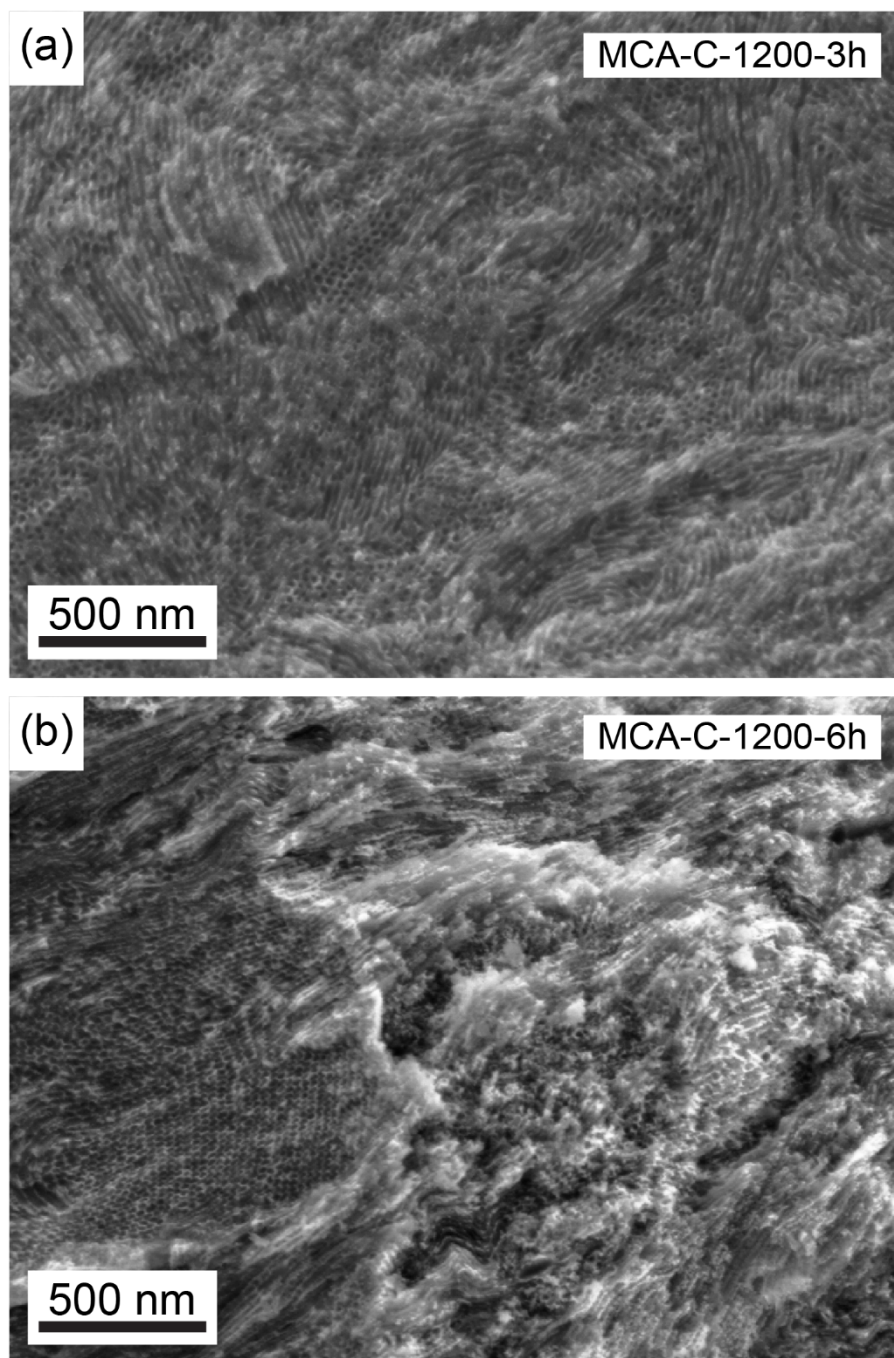

Fig. S3. Lower magnification SEM micrographs of (a) MCA-C-1200-3h and (b) MCA-C-1200-6h composites.

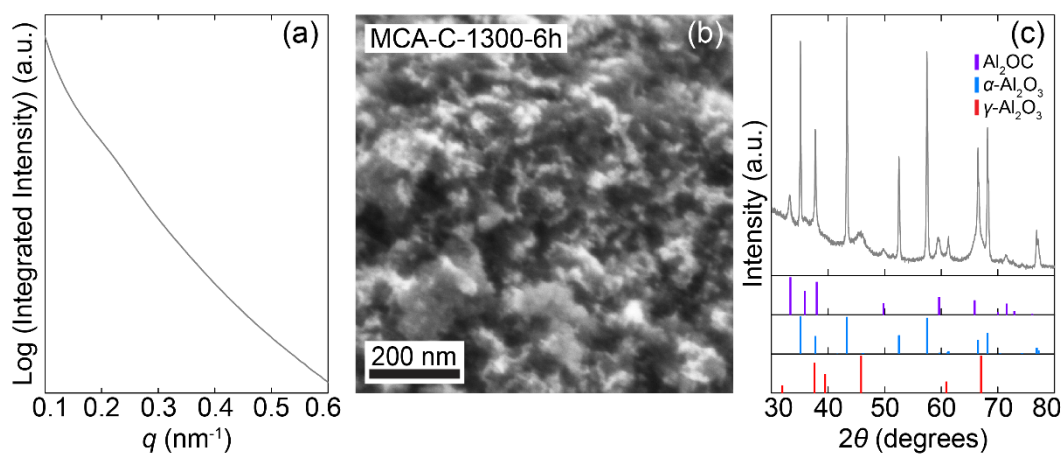

Fig. S4. (a) Azimuthally integrated SAXS pattern, (b) SEM micrograph, and (c) corresponding PXRD pattern of MCA-C-1300-6h composite. PXRD peak markings and relative intensities for  $\text{Al}_2\text{OC}$  (purple, PDF 01-072-3584),  $\alpha\text{-Al}_2\text{O}_3$  (sky blue, PDF 04-004-2852), and  $\gamma\text{-Al}_2\text{O}_3$  (red, PDF 00-010-0425) are shown in (c).

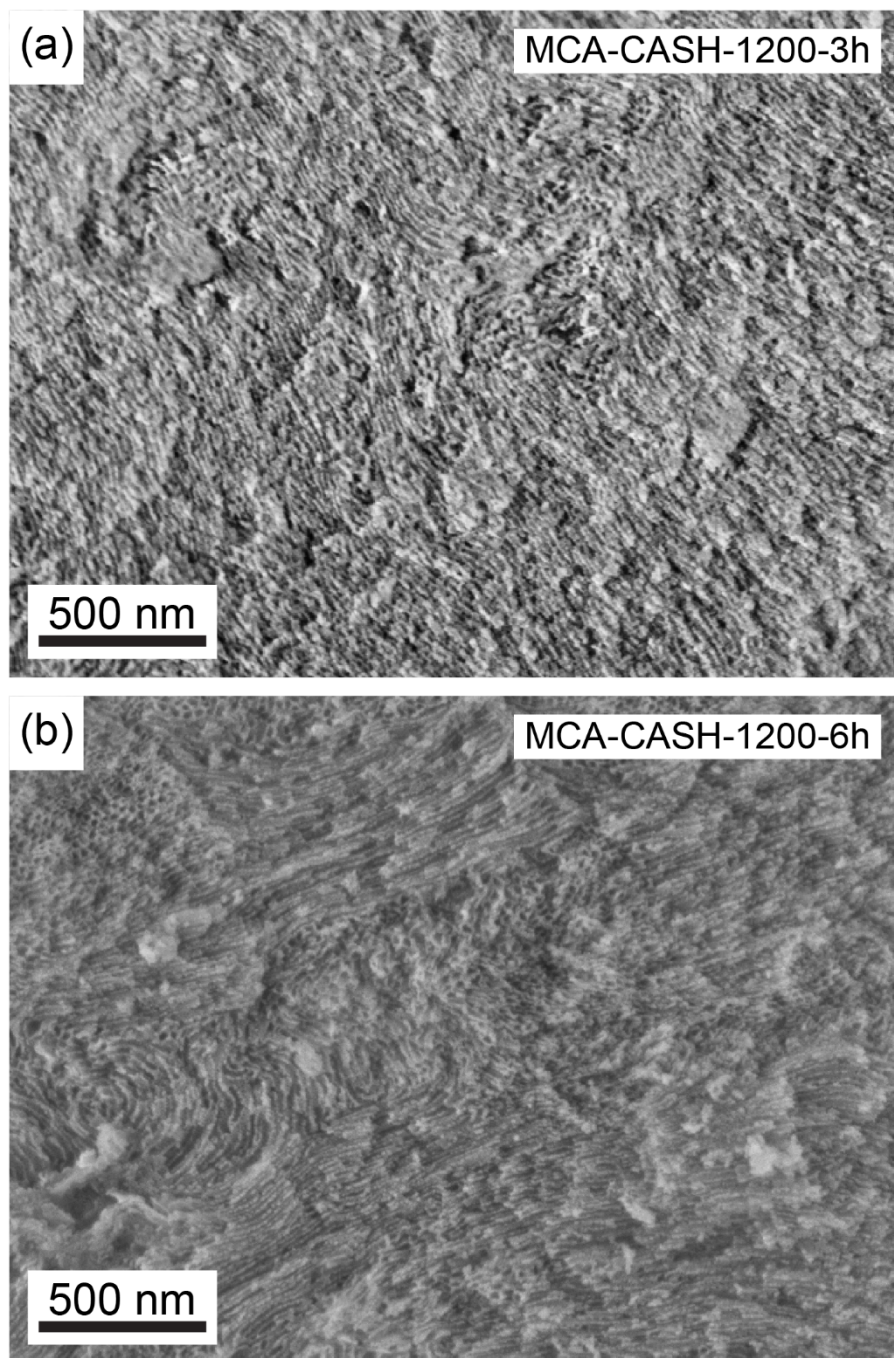

Fig. S5. Lower magnification SEM micrographs of all- $\text{Al}_2\text{O}_3$  samples after carbon removal: (a) MCA-CASH-1200-3h and (b) MCA-CASH-1200-6h.
